# Supplementary material for: Characterizing the Mechanism of Action of an Ancient Antimicrobial, Manuka Honey, against Pseudomonas aeruginosa Using Modern Transcriptomics
Source: PubMed Central journal article supplement (PMC7329319; doi:10.1128/msystems.00106-20), 2020-06-30
Supplement: mSystems.00106-20-sf002.pdf [file mSystems.00106-20-sf002.pdf]

A

Color Key

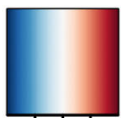

-2 2  
Log<sub>2</sub> FC

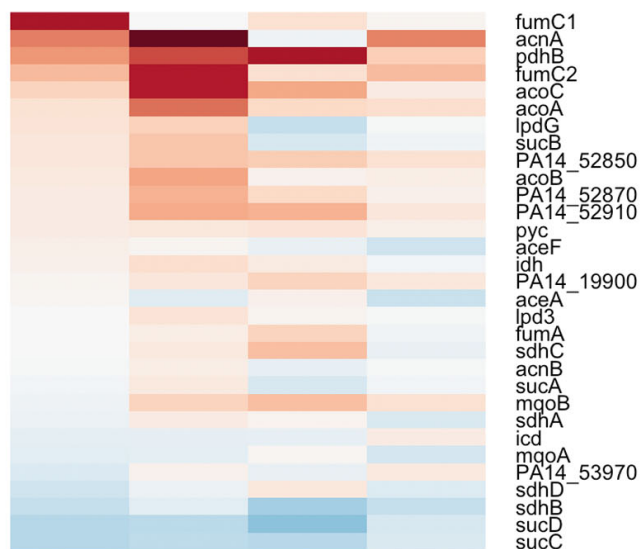

mh

ahmgo

mgo

ah

B

Color Key

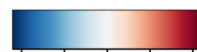

-4 0 2 4  
Log<sub>2</sub> FC

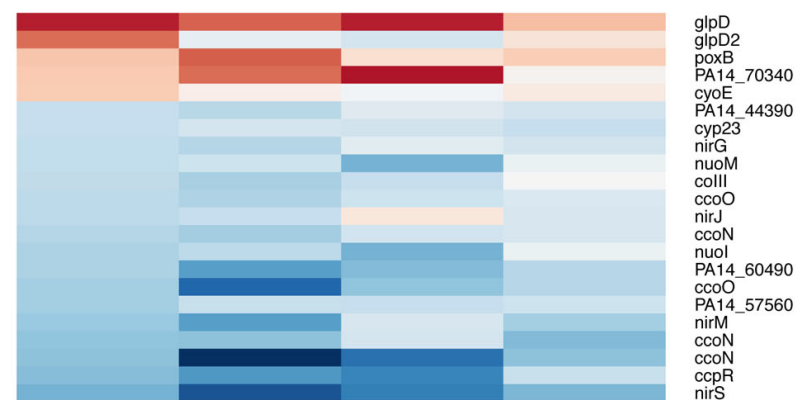

mh

ahmgo

mgo

ah
