# Supplementary material for: Characterizing the Mechanism of Action of an Ancient Antimicrobial, Manuka Honey, against Pseudomonas aeruginosa Using Modern Transcriptomics
Source: PubMed Central journal article supplement (PMC7329319; doi:10.1128/msystems.00106-20), 2020-06-30

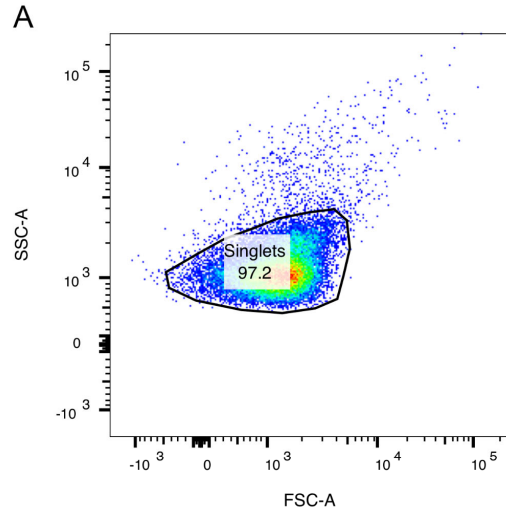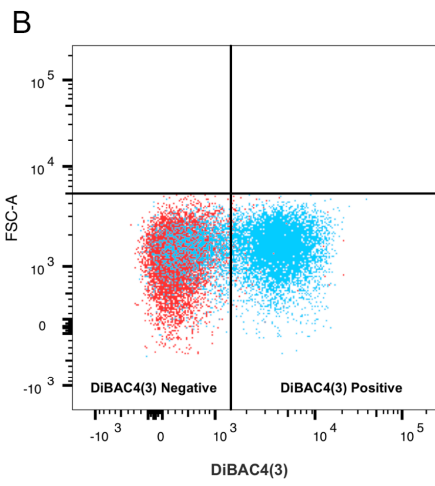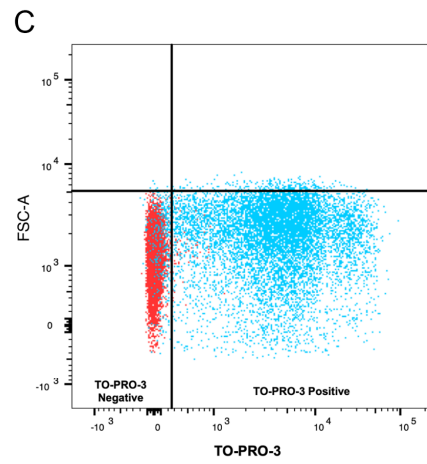

Supplement: mSystems.00106-20-sf003.pdf [file mSystems.00106-20-sf003.pdf]
